# Supplementary material for: Protein-Protein interactions uncover candidate ‘core genes’ within omnigenic disease networks
Source: PLoS Genet. 2020 Jul 17;16(7):e1008903. doi: 10.1371/journal.pgen.1008903 (PMC7390454; doi:10.1371/journal.pgen.1008903)
Supplement: S11 Table — (XLSX) [file pgen.1008903.s022.xlsx]

## Sheet: S11 Table
Cosmic (germline)
ALK
APC
AR
ATM
ATR
AXIN2
BAP1
BARD1
BLM
BMPR1A
BRCA1
BRCA2
BRIP1
BUB1B
CDC73
CDH1
CDK4
CDKN1B
CDKN2A
CHEK2
CXCR4
CYLD
DDB2
DICER1
EGFR
ERBB4
ERCC2
ERCC3
ERCC4
ERCC5
EXT1
EXT2
FANCA
FANCC
FANCD2
FANCE
FANCF
FANCG
FAT1
FH
FLCN
GPC3
HNF1A
HRAS
KDR
KIT
LMO1
MAX
MEN1
MLH1
MPL
MSH2
MSH6
MUTYH
NBN
NF1
NF2
PALB2
PDGFRA
PMS2
POLD1
POLE
POLQ
PRKAR1A
PTCH1
PTEN
PTPN13
RB1
RET
SBDS
SDHA
SDHAF2
SDHB
SDHC
SDHD
SMAD4
SMARCB1
SMARCE1
SPOP
STAT3
STK11
SUFU
TERT
TGFBR2
TP53
TP63
TSC1
TSC2
TSHR
VHL
WAS
WRN
WT1
XPA
XPC
